# Supplementary material
Source: publisher figshare collection journal article supplement (https://acs.figshare.com/ndownloader/files/3594390)
Supplement: Supplementary file 1 [file 3594390]

## Sheet: Sheet1
table S1: The Pka calculation results from Homogneous DelPhi and Gaussian method.
protein	PDB	res_name	res_no	pka exp	pka shift(exp)	pka shift (homogeneous DelPhi)	pka shift (Gaussian method)
WT	1stn	HIS	8	6.5	0.4	-0.83	-1.67
Δ+PHS	3bdc	GLU	10	2.8	-1.5	-1.74	-0.27
Δ+PHS	3bdc	ASP	19	2.2	-1.6	0.21	2.46
G20D Δ+PHS	3bdc_G20D	ASP	20	4	0.2	3.46	5.02
Δ+PHS	3bdc	ASP	21	6.5	2.7	-1.15	1.77
V23K Δ+PHS	3bdc_V23K	LYS	23	7.3	-3.2	-5.13	-3.45
V23E Δ+PHS	3bdc_V23E	GLU	23	7.1	2.8	1.81	2.62
V23D Δ+PHS	3bdc_V23D	ASP	23	6.8	3	-0.35	1.76
L25D Δ+PHS	3bdc_L25D	ASP	25	6.8	3	-1.52	0.47
L25E Δ+PHS	3evq	GLU	25	7.5	3.2	1.89	2.93
L25K Δ+PHS	3erq	LYS	25	6.3	-4.2	-4.52	-3.62
F34D Δ+PHS	3bdc_F34D	ASP	34	7.8	4	-0.66	1.09
F34E Δ+PHS	3bdc_F34E	GLU	34	7.3	3	0.71	1.32
F34K Δ+PHS	3bdc_F34K	LYS	34	7.1	-3.4	-5.01	-3.04
L36D Δ+PHS	3bdc_L36D	ASP	36	7.9	4.1	0.14	1.58
L36E Δ+PHS	3bdc_L36E	GLU	36	8.7	4.4	2.71	2
L36K Δ+PHS	3eji	LYS	36	7.2	-3.3	-3.1	-2.23
L37D Δ+PHS	3bdc_L37D	ASP	37	4	0.2	-0.48	0.7
L37E Δ+PHS	3bdc_L37E	GLU	37	5.2	0.9	1.62	2.37
L38D Δ+PHS	3bdc_L38D	ASP	38	6.8	3	0.83	1.68
L38E PHS	3d6c	GLU	38	6.8	2.5	0.91	3.15
V39K Δ+PHS	3bdc_V39K	LYS	39	9	-1.5	-3.52	-3.26
V39D Δ+PHS	3bdc_V39D	ASP	39	8.1	4.3	0.9	2.39
V39E Δ+PHS	3bdc_V39E	GLU	39	8.2	3.9	2.86	3.25
Δ+PHS	3bdc	ASP	40	3.9	0.1	-0.68	0.76
T41K Δ+PHS	3bdc_T41K	LYS	41	9.3	-1.2	-3.56	-3.74
T41E Δ+PHS	3bdc_T41E	GLU	41	6.5	2.2	3.77	4.27
T41D Δ+PHS	3bdc_T41D	ASP	41	4	0.2	4.85	4.5
Δ+PHS	3bdc	GLU	43	4.3	0	1.05	1.1
WT	1stn	HIS	46	5.9	-0.2	-1.51	-3.64
Δ+PHS	3bdc	GLU	52	3.9	-0.4	0	1.91
Δ+PHS	3bdc	GLU	57	3.5	-0.8	-0.99	0.92
A58E Δ+PHS	3bdc_A58E	GLU	58	7.7	3.4	3.88	4.86
A58D Δ+PHS	3bdc_A58D	ASP	58	6.8	3	2.38	3.8
T62K PHS	3dmu	LYS	62	8.1	-2.4	-3.33	-3.06
T62D Δ+PHS	3bdc_T62D	ASP	62	8.7	4.9	1.61	2.46
T62E Δ+PHS	3bdc_T62E	GLU	62	7.7	3.4	3.43	3.61
V66D PHS	2oxp	ASP	66	8.1	4.3	1.53	3.56
V66K WT	2snm	LYS	66	5.6	-4.9	-5.02	-4.59
V66E PHS	1u9r	GLU	66	8.5	4.2	2.55	3.77
V66K PHS	3hzx	LYS	66	5.6	-4.9	-3.63	-2.43
Δ+PHS	3bdc	GLU	67	3.8	-0.5	-2.16	0.37
I72D Δ+PHS	3bdc_I72D	ASP	72	7.6	3.8	0.09	1.52
I72E Δ+PHS	3ero	GLU	72	7.3	3	-0.43	1.98
I72K Δ+PHS	2rbm	LYS	72	8.6	-1.9	0	-1.39
Δ+PHS	3bdc	GLU	73	3.3	-1	-1.97	-0.87
V74D Δ+PHS	3bdc_V74D	ASP	74	8.3	4.5	0.98	2.38
V74K Δ+PHS	3bdc_V74K	LYS	74	7.4	-3.1	-4.55	-3.79
V74E Δ+PHS	3bdc_V74E	GLU	74	7.8	3.5	2.06	3.11
Δ+PHS	3bdc	GLU	75	3.3	-1	-2.79	-0.09
A90K Δ+PHS	3bdc_A90K	LYS	90	8.6	-1.9	-4.19	-2.78
A90D Δ+PHS	3bdc_A90D	ASP	90	7.5	3.7	0.17	2.79
A90E Δ+PHS	3bdc_A90E	GLU	90	6.4	2.1	1.12	3.46
Y91D Δ+PHS	3bdc_Y91D	ASP	91	7.2	3.4	0.93	2.32
Y91E Δ+PHS	3d4d	GLU	91	7.1	2.8	3.03	3.27
Y91K Δ+PHS	3bdc_Y91K	LYS	91	9	-1.5	-3.18	-3.05
I92E Δ+PHS	1tqo	GLU	92	9	4.7	2.6	3.23
I92E Δ+PHS	1tr5	GLU	92	9	4.7	2.05	2.43
I92K Δ+PHS	1tt2	LYS	92	5.3	-5.2	-5.17	-4.21
I92D Δ+PHS	2oeo	ASP	92	8.1	4.3	1.67	2.79
Δ+PHS	3bdc	ASP	95	2.2	-1.6	-2	-0.02
V99K Δ+PHS	3bdc_V99K	LYS	99	6.5	-4	-4.28	-3.66
V99E Δ+PHS	3bdc_V99E	GLU	99	8.4	4.1	2.34	2.26
V99D Δ+PHS	3bdc_V99D	ASP	99	8.5	4.7	0.97	2.45
N100D Δ+PHS	3bdc_N100D	ASP	100	6.9	3.1	0.08	3.06
N100E Δ+PHS	3bdc_N100E	GLU	100	7.6	3.3	0.28	2.52
N100K Δ+PHS	3bdc_N100K	LYS	100	8.6	-1.9	-5.91	-3.74
Δ+PHS	3bdc	GLU	101	3.8	-0.5	-1.73	-0.73
L103D Δ+PHS	3bdc_L103D	ASP	103	8.7	4.9	0.42	1.84
L103E Δ+PHS	3bdc_L103E	GLU	103	8.9	4.6	3.36	2.69
L103K Δ+PHS	3e5s_b	LYS	103	8.2	-2.3	1.71	0.88
V104E Δ+PHS	3bdc_V104E	GLU	104	9.4	5.1	1.95	2.41
V104D Δ+PHS	3bdc_V104D	ASP	104	9.7	5.9	0.25	2.51
V104K Δ+PHS	3c1f	LYS	104	7.7	-2.8	-2.7	-1.16
A109D Δ+PHS	3bdc_A109D	ASP	109	7.5	3.7	1.03	3.44
A109E Δ+PHS	3bdc_A109E	GLU	109	7.9	3.6	2.72	4.18
A109K Δ+PHS	3bdc_A109K	LYS	109	9.2	-1.3	-4.31	-3.13
N118D Δ+PHS	3bdc_N118D	ASP	118	7	3.2	-0.84	1.66
WT	1stn	HIS	121	5.3	-0.8	-0.26	-1.87
Δ+PHS	3bdc	GLU	122	3.9	-0.4	-2.06	0.25
WT	1stn	HIS	124	5.7	-0.3	-0.89	-2.48
L125K PHS	3c1e	LYS	125	6.2	-4.3	-3.94	-4.36
L125E Δ+PHS	3bdc_L125E	GLU	125	9.1	4.8	2.05	1.72
L125D Δ+PHS	3bdc_L125D	ASP	125	7.6	3.8	-0.24	2.01
Δ+PHS	3bdc	GLU	129	3.8	-0.5	-2.55	-0.13
A132D Δ+PHS	3bdc_A132D	ASP	132	7	3.2	-1.15	2.36
A132E Δ+PHS	3bdc_A132E	GLU	132	7	2.7	1.33	3.28
Δ+PHS	3bdc	GLU	135	3.8	-0.5	-2.14	0.25
Δ+PHS	3bdc	ASP	38	7.2	3.4	1.85	1.61
